# Supplementary material
Source: publisher site journal article supplement (https://www.dovepress.com/article/397680)
Supplement: Supplementary file 1 [file get_supplementary_file.php]

# Appendix S1 – Search Strategy

Ovid Embase Classic+Embase AND Ovid MEDLINE(R) ALL

1. Pregnancy.mp.

2. Pregnant Women.mp.

3. pregnan*.mp.

4. gestation.mp.

5. 1 or 2 or 3 or 4

6. Hypertension.mp.

7. high blood pressure.mp.

8. hypertens*.mp.

9. pre-eclamp*.mp.

10. preeclamp*.mp.

11. HELLP.mp.

12. 6 or 7 or 8 or 9 or 10 or 11

13. case stud*.mp.

14. case report.mp.

15. case series.mp.

16. 13 or 14 or 15

17. 5 and 12 and 16

18. (random* or sham or placebo*).mp.

19. ((singl* or doubl*) adj (blind* or dumm* or mask*)).mp.

20. (cohort adj stud*).mp.

21. (meta-analysis or systematic review).mp.

22. 18 or 19 or 20 or 21

23. 17 not 22

24. limit 23 to human

25. limit 24 to English

(The use of the asterisk in the search strategy is to instruct the search engine to search for the root word and retrieve all alternative endings)

# Appendix S2 – Quality Assessment of Included Case Reports

| Author (and Year) | Were Patient’s Demographic Characteristics Clearly Described? | Was the Patient’s History Clearly Described and Presented as a Timeline? | Was the Current Clinical Condition of the Patient on Presentation Clearly Described? | Were Diagnostic Tests or Assessment Methods and the Results Clearly Described? | Was the Intervention(s) or Treatment Procedure(S) Clearly Described? | Was the Post-Intervention Clinical Condition Clearly Described? | Were Adverse Events (Harms) or Unanticipated Events Identified and Clearly Described? | Does the Case Report Provide Take-Away Lessons? | Final Quality Assessment |
| --- | --- | --- | --- | --- | --- | --- | --- | --- | --- |
| Abushoshah (2020)46 | Yes | Yes | Yes | Yes | No | No | No | No | Moderate |
| Al Ghamdi (2018)47 | Yes | Yes | Yes | No | Yes | Yes | Yes | Yes | High |
| Altalbishi (2015)48 | No | Yes | Yes | Yes | No | Yes | No | Yes | Moderate |
| Aoyagi (2015)49 | No | Yes | No | Yes | No | Yes | No | Yes | Moderate |
| Araujo (2015)50 | No | Yes | Yes | Yes | No | No | No | Yes | Moderate |
| Arcot (2015)51 | No | Yes | No | Yes | No | No | No | Yes | Low |
| Aronsohn (2015)52 | Yes | Yes | Yes | Yes | Yes | Yes | Yes | Yes | High |
| Artinger (2019)53 | No | Yes | No | Yes | No | Yes | Yes | Yes | Moderate |
| Atuk (2018)54 | No | Yes | No | Yes | No | No | No | Yes | Low |
| Balachandar (2019)55 | No | Yes | Yes | Yes | No | No | Yes | Yes | Moderate |
| Balci (2016)56 | No | Yes | Yes | Yes | Yes | No | Yes | Yes | Moderate |
| Belen (2015)57 | No | Yes | No | No | Yes | No | No | Yes | Low |
| Berdai (2016)58 | Yes | Yes | Yes | No | Yes | Yes | Yes | Yes | High |
| Bijral (2018)59 | No | Yes | No | Yes | No | No | Yes | Yes | Moderate |
| Booth (2018)60 | No | Yes | Yes | Yes | Yes | No | No | Yes | Moderate |
| Bradke (2020)61 | No | Yes | Yes | Yes | No | Yes | Yes | Yes | Moderate |
| Brownfoot (2018)62 | Yes | Yes | Yes | Yes | No | No | Yes | Yes | Moderate |
| Cagan (2020)63 | No | Yes | Yes | No | Yes | No | Yes | Yes | Moderate |
| Cao (2019)64 | Yes | Yes | Yes | Yes | Yes | Yes | Yes | Yes | High |
| Celik (2015)65 | No | Yes | No | Yes | No | No | No | Yes | Low |
| Chan (2018)66 | No | Yes | No | Yes | No | No | No | Yes | Low |
| Chen (2016)67 | Yes | Yes | Yes | Yes | No | Yes | Yes | Yes | High |
| Chenkin (2016)68 | Yes | Yes | Yes | Yes | No | No | No | Yes | Moderate |
| Chou (2016)69 | No | Yes | No | Yes | No | Yes | Yes | No | Moderate |
| Dag (2015)70 | No | Yes | No | Yes | Yes | No | No | Yes | Moderate |
| Davies (2020)71 | No | Yes | No | No | No | Yes | No | Yes | Low |
| El-Agwany (2016)72 | No | Yes | No | Yes | No | Yes | Yes | Yes | Moderate |
| El-Agwany (2016)73 | No | Yes | Yes | Yes | No | Yes | No | Yes | Moderate |
| Escobar (2019)74 | No | Yes | No | No | No | No | Yes | Yes | Low |
| Essa (2018)75 | No | Yes | No | Yes | Yes | No | Yes | Yes | Moderate |
| Ferreira (2019)76 | No | Yes | No | No | No | No | No | Yes | Low |
| Fervienza (2017)77 | No | Yes | Yes | No | No | Yes | Yes | Yes | Moderate |
| Fotiou (2016)78 | No | Yes | No | Yes | No | No | No | Yes | Low |
| Fuchs (2016)79 | No | Yes | No | No | Yes | Yes | No | Yes | Moderate |
| Gainder (2015)80 | No | Yes | Yes | No | No | Yes | Yes | No | Moderate |
| Ghazali (2019)81 | No | No | Yes | No | No | Yes | Yes | Yes | Moderate |
| Ghorbanpour (2019)82 | No | Yes | No | No | No | No | No | Yes | Low |
| Grimmett (2019)83 | No | Yes | No | No | No | No | No | Yes | Low |
| Guerby (2020)84 | No | Yes | No | No | No | Yes | No | Yes | Low |
| Guo (2018)85 | Yes | Yes | Yes | Yes | No | No | No | No | Moderate |
| Hakata (2019)86 | No | Yes | No | Yes | Yes | Yes | No | Yes | Moderate |
| Halliday (2017)87 | No | Yes | No | No | No | No | No | No | Low |
| Hassan (2017)88 | Yes | Yes | Yes | No | Yes | No | Yes | Yes | Moderate |
| Hauksdottir (2015)89 | Yes | Yes | Yes | No | No | Yes | No | Yes | Moderate |
| Hayashi (2020)90 | No | Yes | Yes | No | No | Yes | No | Yes | Moderate |
| Hinkson (2018)91 | No | Yes | No | No | No | No | No | Yes | Low |
| Horazeck (2019)92 | No | Yes | No | No | Yes | No | Yes | Yes | Moderate |
| Horie (2019)93 | No | Yes | No | No | No | Yes | No | Yes | Low |
| Hussain (2019)94 | Yes | Yes | Yes | No | No | No | No | Yes | Moderate |
| Jugnanden (2020)95 | No | No | No | No | No | No | No | Yes | Low |
| Kaltofen (2019)96 | No | Yes | Yes | Yes | No | No | Yes | Yes | Moderate |
| Kasai (2016)98 | No | Yes | No | No | No | No | Yes | Yes | Low |
| Kim (2020)99 | No | Yes | No | Yes | Yes | No | No | Yes | Moderate |
| Kinay (2018)100 | No | Yes | Yes | No | No | No | No | Yes | Low |
| Kocher (2019)101 | No | Yes | No | Yes | Yes | Yes | No | Yes | Moderate |
| Koseoglu (2017)102 | Yes | Yes | Yes | Yes | No | No | Yes | Yes | Moderate |
| Kubota-Sjogren (2015)103 | No | Yes | Yes | Yes | Yes | Yes | Yes | Yes | High |
| Kumarasinghe (2017)104 | No | Yes | Yes | No | No | No | Yes | Yes | Moderate |
| Kuwabara (2020)105 | No | Yes | No | No | No | No | No | Yes | Low |
| Lee,M (2017)106 | No | Yes | No | Yes | No | Yes | Yes | No | Moderate |
| Lee, YS (2017)107 | No | Yes | No | No | No | Yes | Yes | Yes | Moderate |
| Loh (2017)108 | No | Yes | No | No | Yes | Yes | No | Yes | Moderate |
| Lokki (2020)109 | No | Yes | Yes | Yes | No | Yes | Yes | Yes | Moderate |
| Luna Russo (2015)110 | No | Yes | No | Yes | Yes | No | No | Yes | Moderate |
| Manning (2018)111 | No | Yes | No | No | No | No | No | Yes | Low |
| Martingano (2018)112 | No | Yes | No | Yes | No | No | No | Yes | Low |
| Martins (2017)113 | Yes | Yes | Yes | No | No | No | Yes | Yes | Moderate |
| Mathias (2019)114 | Yes | Yes | Yes | Yes | No | Yes | Yes | Yes | High |
| Mikolajczyk (2017)115 | No | Yes | No | No | No | No | No | Yes | Low |
| Millan (2017)116 | No | Yes | Yes | No | No | No | No | Yes | Low |
| Mor (2015)117 | No | Yes | Yes | No | No | No | No | Yes | Low |
| Morgan (2019)118 | No | Yes | Yes | No | No | No | Yes | Yes | Moderate |
| Morisawa (2020)119 | No | Yes | Yes | Yes | Yes | No | No | Yes | Moderate |
| Morisawa (2015)120 | No | Yes | No | Yes | No | No | No | Yes | Low |
| Morton (2017)121 | No | Yes | No | No | Yes | No | No | Yes | Low |
| Mould (2020)122 | No | Yes | No | No | No | No | No | Yes | Low |
| Moura (2019)123 | No | Yes | No | No | No | No | No | Yes | Low |
| Mousseaux (2020)124 | No | Yes | No | No | Yes | No | Yes | Yes | Moderate |
| Nakakita (2015)125 | Yes | Yes | No | Yes | Yes | Yes | Yes | Yes | High |
| Narasimhulu (2015)126 | No | Yes | No | No | No | Yes | No | Yes | Low |
| Okumura (2017)127 | No | Yes | No | No | No | No | No | Yes | Low |
| Otten (2017)129 | No | Yes | No | No | Yes | No | Yes | Yes | Moderate |
| Pacarada (2106)130 | No | Yes | No | No | No | No | No | Yes | Low |
| Pritchard (2015)131 | No | Yes | Yes | Yes | No | Yes | Yes | Yes | Moderate |
| Quiros (2016)132 | No | Yes | Yes | Yes | No | No | No | Yes | Moderate |
| Sarkissian (2018)133 | No | Yes | Yes | No | No | Yes | Yes | Yes | Moderate |
| Senthilnathan (2017)134 | No | Yes | No | No | Yes | No | No | Yes | Low |
| Shah (2018)135 | No | Yes | No | No | No | No | No | Yes | Low |
| Sharma (2019)136 | No | No | No | No | No | No | No | Yes | Low |
| Shirozu (2017)137 | No | Yes | No | Yes | Yes | No | No | Yes | Moderate |
| Si (2017)138 | No | Yes | No | No | Yes | No | Yes | Yes | Moderate |
| Sienas (2018)139 | No | Yes | No | Yes | Yes | No | Yes | Yes | Moderate |
| Suzuki (2020)141 | No | Yes | No | Yes | No | No | No | Yes | Low |
| Takahashi (2017)142 | No | Yes | No | Yes | No | No | Yes | Yes | Moderate |
| Tanaka (2015)143 | Yes | Yes | Yes | Yes | No | No | No | Yes | Moderate |
| Tolefac (2018)144 | No | Yes | Yes | Yes | Yes | No | No | Yes | Moderate |
| Tolera (2018)145 | No | Yes | Yes | No | No | No | No | Yes | Low |
| Tran (2020)146 | No | Yes | No | Yes | No | No | No | Yes | Low |
| Tripathy (2018)147 | No | Yes | No | No | No | No | No | No | Low |
| Troja (2015)148 | No | Yes | No | No | No | No | No | Yes | Low |
| Tskhay (2016)149 | No | Yes | No | Yes | No | Yes | Yes | Yes | Moderate |
| Vanden Eede (2018)150 | No | Yes | Yes | Yes | Yes | No | No | Yes | Moderate |
| Whitehead (2015)151 | Yes | Yes | Yes | Yes | Yes | No | No | Yes | Moderate |
| Zhang (2019)152 | No | Yes | No | No | No | No | No | Yes | Low |

# Appendix S3 – Quality Assessment of Included Case Series

| Author (Year) | Were There Clear Criteria for Inclusion in the Case Series? | Was the Condition Measured in a Standard, Reliable Way for all Participants Included in the Case Series? | Were Valid Methods Used for Identification of the Condition for All Participants Included in the Case? Series? | Did the Case Series Have Consecutive Inclusion of Participants? | Did the Case Series Have Complete Inclusion of Participants? | Was There Clear Reporting of the Demographics of the Participants in the Study? | Was There Clear Reporting of Clinical Information of the Participants? | Were the Outcomes or Follow- up Results of Cases Clearly Reported? | Was There Clear Reporting of the Presenting Site(S)/Clinic(S) Demographic Information? | Was Statistical Analysis Appropriate? | Final Quality Assessment |
| --- | --- | --- | --- | --- | --- | --- | --- | --- | --- | --- | --- |
| Kanonge (2018)97 | No | No | Yes | No | No | No | No | Yes | No | No | Low |
| Oliveira (2017)128 | Yes | Yes | Yes | No | No | No | No | No | No | Yes | Moderate |
| Suryawan (2020)140 | No | No | Yes | No | No | No | Yes | No | No | Yes | Low |

# Appendix S4 –Hypotheses of Included Studies

| Study (Author and Year) | Interpreted Hypothesis |
| --- | --- |
| Aronsohn (2015)52 | Surgical treatment of enlarged thyroid in high-risk parturient may decrease the risk of cardiac arrest. |
| Balci (2016)56 | Incomplete separation of the placenta in cases of intrauterine death of one twin, in cases of a discordance in dichorionic twins gestation, may be associated with the return of preeclampsia after initial resolution. |
| Brownfoot (2018)62 | Sildenafil administration in patients with periviable pregnancy and preeclampsia maybe associated with prolonged gestation and improved outcomes. |
| Chen (2016)67 | Unidentified factors or triggers in the maternal serum at initial presentation of preeclampsia was responsible for producing “dangerous” or "toxic trophoblastic debris" leading to deterioration of the condition through endothelial activation. |
| Fotiou (2016)78 | Elevated uric acid and potassium concentration, as well as cysteine to methionine ratio in amniotic fluid, may be associated with preeclampsia. |
| Fuchs (2016)79 | Selective feticide in cases of a discordance in dichorionic twins gestation may help resolve HELLP syndrome. |
| Ghazali (2019)81 | In patients with preeclampsia and nephrotic range proteinuria, hypoalbuminemia may be a contributing factor to hyponatremia and ascites. |
| Grimmett (2019)83 | Preeclampsia may cause hyponatremia. |
| Guerby (2020)84 | Selective feticide in cases of a discordance in dichorionic twins gestation in the third trimester may be associated with a decrease in the substances involved in the physiopathology of preeclampsia and may lead to better maternal outcomes. |
| Hauksdottir (2015)89 | Licorice ingestions in patients with an 11beta-HSD2 genetic defect may be associated with early severe preeclampsia. |
| Hayashi (2020)90 | Spontaneous intrauterine death of a twin in a discordance in dichorionic twins gestation during the third trimester may be associated with the resolution of preeclampsia. |
| Hinkson (2018)91 | Hyponatremia may be associated with adverse outcomes in patients with preeclampsia. |
| Kim (2020)99 | In patients with preeclampsia and obstructive sleep apnea, CPAP may help control blood pressure and prolong pregnancy. |
| Kocher (2019)101 | Acupuncture therapy may be associated with positive outcomes in patients with preeclampsia. |
| Kuwabara (2020)105 | Enhanced expression of sFlt-1 in the syncytiotrophoblast may be part of the etiology of preeclampsia in patients with placental mesenchymal dysplasia. |
| Lokki (2020)109 | Eculizumab may be associated with positive outcomes in patients with HELLP syndrome. |
| Manning (2018)111 | Chronic cannabis use with *H. pylori* colonization maybe a risk factor for the development of preeclampsia. |
| Martins (2017)113 | Plasma exchange therapy may be associated with the prolongation of pregnancy in cases with suspected preeclampsia and HELLP syndrome. |
| Morisawa (2020)119 | Hemodialysis is associated with a decreased value of angiogenic and anti-angiogenic markers as predictive markers for preeclampsia. |
| Morton (2017)121 | Eplerenone 25 mg twice daily may be associated with beneficial blood pressure control on patients who are obese, have obstructive sleep apnea, and have preeclampsia with resistant hypertension. |
| Mould (2020)122 | Temporal shear wave elastography and shear wave dispersion abnormalities are corellated with B-Mode ultrasound imaging and liver function biochemical markers in patients with HELLP syndrome. |
| Mousseaux (2020)124 | Plasma exchange therapy may be associated with positive maternal outcomes in patients with HELLP and diminished levels of *ADAMTS13*. |
| Nakakita (2015)125 | sFlt1 apheresis may be associated with positive maternal outcomes in patients with early onset preeclampsia. |
| Narasimhulu (2015)126 | Complete placental involution of spontaneous intrauterine death of a twin in a discordance in dichorionic twins gestation is required for the resolution of preeclampsia. |
| Oliveira (2017)128 | The observed increase in the impedance to flow in the ophthalmic artery after the administration of MgSO4 in a patient with preeclampsia may explain the mechanism of action of MgSO4 in preventing eclamptic seizure attacks. |
| Otten (2017)129 | Pravastatin may be associated with positive outcomes in patients with HELLP syndrome. |
| Quiros (2016)132 | High sFlt-1/PlGF ratio may be a useful test to distinguish between non-HELLP thrombocytopenia and HELLP syndrome. |
| Si (2017)138 | Massive GI hemorrhage and the associated inflammatory response may be associated with the development of HELLP syndrome. |
| Tran (2020)146 | Echocardiographic findings in patients with preeclampsia and acute myocardial infarction associated with asymmetric left ventricular hypertrophy may be reversible after the resolution of preeclampsia. |
| Tskhay (2016)149 | Dydrogesterone may prevent preeclampsia in patients with a high risk of developing preeclampsia. |
| Whitehead (2015)151 | CPAP in a patient with obstructive sleep apnea and preeclampsia may enable pregnancy prolongation and improved neonatal outcomes. |

Abbreviations: CPAP = continuous positive airway pressure; GI = gastrointestinal; HELLP = hemolysis, elevated liver enzymes, and low platelet count; sFlt-1 = soluble fms-like tyrosine kinase-1; MgSO4 = magnesium sulphate; PIGF = placental growth factor.
